# Supplementary material
Source: HighWire-hosted journal article supplement (https://bjsm.bmj.com/content/52/19/1246)
Supplement: inline-supplementary-material-1 [file inline-supplementary-material-1.docx]

**Appendix Table 1. PubMed Search String**

| ((((((((((((sports) OR athletic) OR soft tissue) OR overuse) OR musculoskeletal) OR back) OR lower extremity) OR upper extremity) OR neck)) AND (((pain) OR injury) OR fracture)) AND (((((((((((((((((((bone age) OR skeletal age) OR body size) OR peak height velocity) OR height velocity) OR growth spurt) OR maturation) OR skeletal maturity) OR biologic maturity) OR sexual maturity) OR Tanner stage) OR Tanner staging) OR puberty) OR somatic growth) OR pubertal development) OR pubertal spurt) OR sex factor) OR risk factor) OR anthropometr*)) AND ((child*) OR adolescen*) |
| --- |
